# Supplementary material
Source: PubMed Central journal article supplement (PMC2592557)
Supplement: NIHMS62625-supplement-1.pdf [file NIHMS62625-supplement-1.pdf]

# SUPPLEMENTARY INFORMATION

Global Analysis of Protein-Protein Interactions Reveals

Multiple CYP2E1–Reductase Complexes<sup>†</sup>

Arvind P. Jamakhandi<sup>‡</sup>, Petr Kuzmic<sup>§</sup>, Daniel E. Sanders<sup>‡</sup>, and Grover P. Miller<sup>‡,\*</sup>

<sup>‡</sup>Department of Biochemistry and Molecular Biology, University of Arkansas for  
Medical Sciences, Little Rock, AR 72205, USA

<sup>§</sup>BioKin, Ltd, Pullman, WA 99163, USA

## CONTENTS

|                                                                      |    |
|----------------------------------------------------------------------|----|
| DynaFit Script and Experimental Data - Model Discrimination #1 ..... | 2  |
| Results - Model Discrimination #1 .....                              | 20 |
| DynaFit Script and Experimental Data - Model Discrimination #2 ..... | 22 |
| Results - Model Discrimination #2.....                               | 28 |

## DynaFit Script and Experimental Data - Model Discrimination #1

```
;

---

  
[task]  
  
  data = equilibria  
  task = fit  
  model = PR* ?  
  
[components]  
  
  P, R  
  
[mechanism]  
  
  P + R <====> P.R      :      Kpr   dissoc  
  
[constants]  
  
  Kpr = 0.1 ?  
  
[responses]  
  
  P.R = 10 ?  
  
[concentrations]  
  
[data]  
  
  variable   P, R  
  set        alldata  
  
[output]  
  
  directory  ./output/models-round-1  
  
;
```

```
[task]  
  
  data = equilibria  
  task = fit  
  model = PR*-P2R* ?  
  
[mechanism]  
  
  P + R <====> P.R      :      Kpr   dissoc  
  P.R + P <====> P.P.R   :      Kppr  dissoc  
  
[constants]
```

```

Kpr = 0.1 ?
Kprr = 0.1 ?

[responses]

P.R = 10 ?
P.P.R = 10 ?

; _____

[task]

data = equilibria
task = fit
model = PR*-PR2* ?

[mechanism]

P + R <===> P.R           :      Kpr   dissoc
P.R + R <===> P.R.R        :      Kprr  dissoc

[constants]

Kpr = 0.1 ?
Kprr = 0.1 ?

[responses]

P.R = 10 ?
P.R.R = 10 ?

; _____

[task]

data = equilibria
task = fit
model = PR*-PR2*-P2R* ?

[mechanism]

P + R <===> P.R           :      Kpr   dissoc
P.R + R <===> P.R.R        :      Kprr  dissoc
P.R + P <===> P.P.R        :      Kppr  dissoc

[constants]

Kpr = 0.1 ?
Kprr = 0.1 ?
Kppr = 0.1 ?

[responses]

P.R = 10 ?
P.R.R = 10 ?
P.P.R = 10 ?

```

```

;
[task]

  data = equilibria
  task = fit
  model = PR*-P2R2* ?

[mechanism]

  P + R <===> P.R           :      Kpr   dissoci
  P.R + P.R <===> P.R.P.R    :      Kprpr dissoci

[constants]

  Kpr = 0.1 ?
  Kprpr = 0.1 ?

[responses]

  P.R = 10 ?
  P.R.P.R = 10 ?
;

```

```

[task]

  data = equilibria
  task = fit
  model = PR*-P2R*-P2R2* ?

[mechanism]

  P + R <===> P.R           :      Kpr   dissoci
  P.R + P <===> P.P.R        :      Kppr  dissoci
  P.P.R + R <===> P.R.P.R    :      Kprpr dissoci

[constants]

  Kpr = 0.1 ?
  Kppr = 0.1 ?
  Kprpr = 0.1 ?

[responses]

  P.R = 10 ?
  P.P.R = 10 ?
  P.R.P.R = 10 ?
;

```

```

[task]

  data = equilibria
  task = fit
  model = PR*-PR2*-P2R2* ?

[mechanism]

```

```
P + R <====> P.R          :      Kpr  dissoc
P.R + R <====> P.R.R       :      Kpr  dissoc
P.R.R + P <====> P.R.P.R   :      Kprpr dissoc
```

[constants]

```
Kpr = 0.1 ?
Kprr = 0.1 ?
Kprpr = 0.1 ?
```

[responses]

```
P.R = 10 ?
P.R.R = 10 ?
P.R.P.R = 10 ?
```

;

---

[task]

```
data = equilibria
task = fit
model = PR*-P2R*-PR2*-P2R2* ?
```

[mechanism]

```
P + R <====> P.R          :      Kpr  dissoc
P.R + P <====> P.P.R       :      Kppr  dissoc
P.R + R <====> P.R.R       :      Kpr  dissoc
P.R.R + P <====> P.R.P.R   :      Kprpr dissoc
```

[constants]

```
Kpr = 0.1 ?
Kppr = 0.1 ?
Kprr = 0.1 ?
Kprpr = 0.1 ?
```

[responses]

```
P.R = 10 ?
P.P.R = 10 ?
P.R.R = 10 ?
P.R.P.R = 10 ?
```

;

---

[task]

```
data = equilibria
task = fit
model = PR*-P2 ?
```

[components]

```
P, R
```

[mechanism]

```

P + R <====> P.R      :      Kpr   dissoci
P + P <====> P.P      :      Kpp   dissoci

[constants]

Kpr = 0.1 ?
Kpp = 0.1 ?

[responses]

P.R = 10 ?

; _____

[task]

data = equilibria
task = fit
model = PR*-P2R*-P2 ?

[mechanism]

P + R <====> P.R      :      Kpr   dissoci
P.R + P <====> P.P.R  :      Kppr  dissoci
P + P <====> P.P      :      Kpp   dissoci

[constants]

Kpr = 0.1 ?
Kppr = 0.1 ?
Kpp = 0.1 ?

[responses]

P.R = 10 ?
P.P.R = 10 ?

; _____

[task]

data = equilibria
task = fit
model = PR*-PR2*-P2 ?

[mechanism]

P + R <====> P.R      :      Kpr   dissoci
P.R + R <====> P.R.R  :      Kppr  dissoci
P + P <====> P.P      :      Kpp   dissoci

[constants]

Kpr = 0.1 ?
Kppr = 0.1 ?
Kpp = 0.1 ?

```

[responses]

P.R = 10 ?  
P.R.R = 10 ?

;

---

[task]

data = equilibria  
task = fit  
model = PR\*-PR2\*-P2R\*-P2 ?

[mechanism]

P + R <===> P.R : Kpr dissociation  
P.R + R <===> P.R.R : Kpr dissociation  
P.R + P <===> P.P.R : Kpr dissociation  
P + P <===> P.P : Kpp dissociation

[constants]

Kpr = 0.1 ?  
Kprr = 0.1 ?  
Kppr = 0.1 ?  
Kpp = 0.1 ?

[responses]

P.R = 10 ?  
P.R.R = 10 ?  
P.P.R = 10 ?

;

---

[task]

data = equilibria  
task = fit  
model = PR\*-P2R2\*-P2 ?

[mechanism]

P + R <===> P.R : Kpr dissociation  
P.R + P.R <===> P.R.P.R : Kpr dissociation  
P + P <===> P.P : Kpp dissociation

[constants]

Kpr = 0.1 ?  
Kprpr = 0.1 ?  
Kpp = 0.1 ?

[responses]

P.R = 10 ?  
P.R.P.R = 10 ?

;

---

[task]

```
data = equilibria
task = fit
model = PR*-P2R*-P2R2*-P2 ?
```

[mechanism]

```
P + R <====> P.R           :      Kpr  dissoc
P.R + P <====> P.P.R        :      Kppr  dissoc
P.P.R + R <====> P.R.P.R    :      Kprpr  dissoc
P + P <====> P.P            :      Kpp  dissoc
```

[constants]

```
Kpr = 0.1 ?
Kppr = 0.1 ?
Kprpr = 0.1 ?
Kpp = 0.1 ?
```

[responses]

```
P.R = 10 ?
P.P.R = 10 ?
P.R.P.R = 10 ?
```

;

---

[task]

```
data = equilibria
task = fit
model = PR*-PR2*-P2R2*-P2 ?
```

[mechanism]

```
P + R <====> P.R           :      Kpr  dissoc
P.R + R <====> P.R.R        :      Kprrr  dissoc
P.R.R + P <====> P.R.P.R    :      Kprpr  dissoc
P + P <====> P.P            :      Kpp  dissoc
```

[constants]

```
Kpr = 0.1 ?
Kprrr = 0.1 ?
Kprpr = 0.1 ?
Kpp = 0.1 ?
```

[responses]

```
P.R = 10 ?
P.R.R = 10 ?
P.R.P.R = 10 ?
```

;

---

[task]



```

data = equilibria
task = fit
model = PR*-P2R*-PR2*-P2R2*-P2 ?

[mechanism]

P + R <====> P.R           :      Kpr   dissoci
P.R + P <====> P.P.R        :      Kppr  dissoci
P.R + R <====> P.R.R        :      Kprrr dissoci
P.R.R + P <====> P.R.P.R    :      Kprprr dissoci
P + P <====> P.P           :      Kpp   dissoci

[constants]

Kpr = 0.1 ?
Kppr = 0.1 ?
Kprrr = 0.1 ?
Kprprr = 0.1 ?
Kpp = 0.1 ?

[responses]

P.R = 10 ?
P.P.R = 10 ?
P.R.R = 10 ?
P.R.P.R = 10 ?
;_____

[task]

data = equilibria
task = fit
model = PR*-R2 ?

[components]

P, R

[mechanism]

P + R <====> P.R           :      Kpr   dissoci
R + R <====> R.R           :      Krr   dissoci

[constants]

Kpr = 0.1 ?
Krr = 0.1 ?

[responses]

P.R = 10 ?
;_____

[task]

data = equilibria

```

```
task = fit
model = PR*-P2R*-R2 ?
```

[mechanism]

```
P + R <====> P.R           :      Kpr   dissoci
P.R + P <====> P.P.R        :      Kppr  dissoci
R + R <====> R.R            :      Krr   dissoci
```

[constants]

```
Kpr = 0.1 ?
Kppr = 0.1 ?
Krr = 0.1 ?
```

[responses]

```
P.R = 10 ?
P.P.R = 10 ?
```

;

---

[task]

```
data = equilibria
task = fit
model = PR*-PR2*-R2 ?
```

[mechanism]

```
P + R <====> P.R           :      Kpr   dissoci
P.R + R <====> P.R.R        :      Kprrr dissoci
R + R <====> R.R            :      Krr   dissoci
```

[constants]

```
Kpr = 0.1 ?
Kprrr = 0.1 ?
Krr = 0.1 ?
```

[responses]

```
P.R = 10 ?
P.R.R = 10 ?
```

;

---

[task]

```
data = equilibria
task = fit
model = PR*-PR2*-P2R*-R2 ?
```

[mechanism]

```
P + R <====> P.R           :      Kpr   dissoci
P.R + R <====> P.R.R        :      Kprrr dissoci
```

```

P.R + P <====> P.P.R      :      Kppr  dissoc
R + R <====> R.R           :      Krr   dissoc

[constants]

Kpr = 0.1 ?
Kprr = 0.1 ?
Kppr = 0.1 ?
Krr = 0.1 ?

[responses]

P.R = 10 ?
P.R.R = 10 ?
P.P.R = 10 ?
;_____

[task]

data = equilibria
task = fit
model = PR*-P2R2*-R2 ?

[mechanism]

P + R <====> P.R          :      Kpr   dissoc
P.R + P.R <====> P.R.P.R  :      Kprpr  dissoc
R + R <====> R.R          :      Krr   dissoc

[constants]

Kpr = 0.1 ?
Kprpr = 0.1 ?
Krr = 0.1 ?

[responses]

P.R = 10 ?
P.R.P.R = 10 ?
;_____

[task]

data = equilibria
task = fit
model = PR*-P2R*-P2R2*-R2 ?

[mechanism]

P + R <====> P.R          :      Kpr   dissoc
P.R + P <====> P.P.R      :      Kppr  dissoc
P.P.R + R <====> P.R.P.R  :      Kprpr  dissoc
R + R <====> R.R          :      Krr   dissoc

[constants]

Kpr = 0.1 ?

```

```

Kppr = 0.1 ?
Kprpr = 0.1 ?
Krr = 0.1 ?

[responses]

P.R = 10 ?
P.P.R = 10 ?
P.R.P.R = 10 ?
;_____

[task]

data = equilibria
task = fit
model = PR*-PR2*-P2R2*-R2 ?

[mechanism]

P + R <====> P.R           :      Kpr  dissociation
P.R + R <====> P.R.R        :      Kprr dissociation
P.R.R + P <====> P.R.P.R    :      Kprpr dissociation
R + R <====> R.R            :      Krr   dissociation

[constants]

Kpr = 0.1 ?
Kprr = 0.1 ?
Kprpr = 0.1 ?
Krr = 0.1 ?

[responses]

P.R = 10 ?
P.R.R = 10 ?
P.R.P.R = 10 ?
;_____

[task]

data = equilibria
task = fit
model = PR*-P2R*-PR2*-P2R2*-R2 ?

[mechanism]

P + R <====> P.R           :      Kpr  dissociation
P.R + P <====> P.P.R        :      Kprr dissociation
P.R + R <====> P.R.R        :      Kprr dissociation
P.R.R + P <====> P.R.P.R    :      Kprpr dissociation
R + R <====> R.R            :      Krr   dissociation

[constants]

Kpr = 0.1 ?
Kprpr = 0.1 ?
Kprr = 0.1 ?

```

```

Kprpr = 0.1 ?
Krr = 0.1 ?

[responses]

P.R = 10 ?
P.P.R = 10 ?
P.R.R = 10 ?
P.R.P.R = 10 ?
;_____

[task]

data = equilibria
task = fit
model = PR*-P2-R2 ?

[components]

P, R

[mechanism]

P + R <====> P.R      :      Kpr    dissoci
P + P <====> P.P      :      Kpp    dissoci
R + R <====> R.R      :      Krr    dissoci

[constants]

Kpr = 0.1 ?
Kpp = 0.1 ?
Krr = 0.1 ?

[responses]

P.R = 10 ?
;_____

[task]

data = equilibria
task = fit
model = PR*-P2R*-P2-R2 ?

[mechanism]

P + R <====> P.R      :      Kpr    dissoci
P.R + P <====> P.P.R  :      Kppr   dissoci
P + P <====> P.P      :      Kpp    dissoci
R + R <====> R.R      :      Krr    dissoci

[constants]

Kpr = 0.1 ?
Kppr = 0.1 ?
Kpp = 0.1 ?

```

```

Krr = 0.1 ?

[responses]

P.R = 10 ?
P.P.R = 10 ?

;_____

[task]

data = equilibria
task = fit
model = PR*-PR2*-P2-R2 ?

[mechanism]

P + R <====> P.R           :      Kpr  dissociation
P.R + R <====> P.R.R        :      KprR dissociation
P + P <====> P.P           :      Kpp  dissociation
R + R <====> R.R           :      Krr  dissociation

[constants]

Kpr = 0.1 ?
KprR = 0.1 ?
Kpp = 0.1 ?
Krr = 0.1 ?

[responses]

P.R = 10 ?
P.R.R = 10 ?

;_____

[task]

data = equilibria
task = fit
model = PR*-PR2*-P2R*-P2-R2 ?

[mechanism]

P + R <====> P.R           :      Kpr  dissociation
P.R + R <====> P.R.R        :      KprR dissociation
P.R + P <====> P.P.R        :      KprP dissociation
P + P <====> P.P           :      Kpp  dissociation
R + R <====> R.R           :      Krr  dissociation

[constants]

Kpr = 0.1 ?
KprR = 0.1 ?
KprP = 0.1 ?
Kpp = 0.1 ?
Krr = 0.1 ?

```

[responses]

P.R = 10 ?  
P.R.R = 10 ?  
P.P.R = 10 ?

;

---

[task]

data = equilibria  
task = fit  
model = PR\*-P2R2\*-P2-R2 ?

[mechanism]

P + R <====> P.R : Kpr dissociation  
P.R + P.R <====> P.R.P.R : Kprpr dissociation  
P + P <====> P.P : Kpp dissociation  
R + R <====> R.R : Krr dissociation

[constants]

Kpr = 0.1 ?  
Kprpr = 0.1 ?  
Kpp = 0.1 ?  
Krr = 0.1 ?

[responses]

P.R = 10 ?  
P.R.P.R = 10 ?

;

---

[task]

data = equilibria  
task = fit  
model = PR\*-P2R\*-P2R2\*-P2-R2 ?

[mechanism]

P + R <====> P.R : Kpr dissociation  
P.R + P <====> P.P.R : Kppr dissociation  
P.P.R + R <====> P.R.P.R : Kprpr dissociation  
P + P <====> P.P : Kpp dissociation  
R + R <====> R.R : Krr dissociation

[constants]

Kpr = 0.1 ?  
Kppr = 0.1 ?  
Kprpr = 0.1 ?  
Kpp = 0.1 ?  
Krr = 0.1 ?

[responses]

```

P.R = 10 ?
P.P.R = 10 ?
P.R.P.R = 10 ?
;


---


[task]

data = equilibria
task = fit
model = PR*-PR2*-P2R2*-P2-R2 ?

[mechanism]

P + R <====> P.R           :      Kpr   dissociation
P.R + R <====> P.R.R        :      Kprrr dissociation
P.R.R + P <====> P.R.P.R    :      Kprprr dissociation
P + P <====> P.P            :      Kpp    dissociation
R + R <====> R.R            :      Krr    dissociation

[constants]

Kpr = 0.1 ?
Kprrr = 0.1 ?
Kprprr = 0.1 ?
Kpp = 0.1 ?
Krr = 0.1 ?

[responses]

P.R = 10 ?
P.R.R = 10 ?
P.R.P.R = 10 ?
;


---


[task]

data = equilibria
task = fit
model = PR*-P2R*-PR2*-P2R2*-P2-R2 ?

[mechanism]

P + R <====> P.R           :      Kpr   dissociation
P.R + P <====> P.P.R        :      Kpprr dissociation
P.R + R <====> P.R.R        :      Kprrr dissociation
P.R.R + P <====> P.R.P.R    :      Kprprr dissociation
P + P <====> P.P            :      Kpp    dissociation
R + R <====> R.R            :      Krr    dissociation

[constants]

Kpr = 0.1 ?
Kpprr = 0.1 ?
Kprrr = 0.1 ?
Kprprr = 0.1 ?
Kpp = 0.1 ?

```



```

Krr = 0.1 ?

[responses]

P.R = 10 ?
P.P.R = 10 ?
P.R.R = 10 ?
P.R.P.R = 10 ?

;_____

[set:alldata]

P_tot R_tot rate
=====
; Constant [R] = 0.0075, variable [P]

0.0075      0.0075      0.00776
0.0150      0.0075      0.01392
0.0300      0.0075      0.01849
0.0600      0.0075      0.02508
0.1000      0.0075      0.02651
0.2000      0.0075      0.02994
0.3000      0.0075      0.03101
0.4000      0.0075      0.02843
0.0075      0.0075      0.00894
0.0150      0.0075      0.01624
0.0300      0.0075      0.02498
0.0600      0.0075      0.02820
0.1000      0.0075      0.03220
0.2000      0.0075      0.03354
0.3000      0.0075      0.03636
0.4000      0.0075      0.03444

; Constant [R] = 0.0150, variable [P]

0.0075      0.0150      0.01078
0.0150      0.0150      0.04981
0.0300      0.0150      0.08317
0.0600      0.0150      0.09133
0.1000      0.0150      0.10090
0.2000      0.0150      0.10750
0.3000      0.0150      0.10700
0.4000      0.0150      0.09316
0.0075      0.0150      0.01415
0.0150      0.0150      0.04119
0.0300      0.0150      0.07528
0.0600      0.0150      0.09700
0.1000      0.0150      0.10240
0.2000      0.0150      0.11680
0.3000      0.0150      0.11200
0.4000      0.0150      0.11050

; Constant [R] = 0.0300, variable [P]

0.0075      0.0300      0.02263

```

|        |        |         |
|--------|--------|---------|
| 0.0150 | 0.0300 | 0.07508 |
| 0.0300 | 0.0300 | 0.12210 |
| 0.0600 | 0.0300 | 0.15240 |
| 0.1000 | 0.0300 | 0.18510 |
| 0.2000 | 0.0300 | 0.20000 |
| 0.3000 | 0.0300 | 0.19380 |
| 0.4000 | 0.0300 | 0.20000 |
| 0.0075 | 0.0300 | 0.02529 |
| 0.0150 | 0.0300 | 0.07633 |
| 0.0300 | 0.0300 | 0.12580 |
| 0.0600 | 0.0300 | 0.14090 |
| 0.1000 | 0.0300 | 0.17940 |
| 0.2000 | 0.0300 | 0.21380 |
| 0.3000 | 0.0300 | 0.19970 |
| 0.4000 | 0.0300 | 0.21780 |

; Constant [R] = 0.0600, variable [P]

|        |        |         |
|--------|--------|---------|
| 0.0075 | 0.0600 | 0.02419 |
| 0.0150 | 0.0600 | 0.05593 |
| 0.0300 | 0.0600 | 0.17880 |
| 0.0600 | 0.0600 | 0.19190 |
| 0.1000 | 0.0600 | 0.38380 |
| 0.2000 | 0.0600 | 0.41980 |
| 0.3000 | 0.0600 | 0.40820 |
| 0.4000 | 0.0600 | 0.41400 |
| 0.0075 | 0.0600 | 0.02915 |
| 0.0150 | 0.0600 | 0.06719 |
| 0.0300 | 0.0600 | 0.17680 |
| 0.0600 | 0.0600 | 0.18680 |
| 0.1000 | 0.0600 | 0.37670 |
| 0.2000 | 0.0600 | 0.39840 |
| 0.3000 | 0.0600 | 0.38470 |
| 0.4000 | 0.0600 | 0.39150 |

; Constant [R] = 0.1000, variable [P]

|        |        |         |
|--------|--------|---------|
| 0.0075 | 0.1000 | 0.03527 |
| 0.0150 | 0.1000 | 0.07973 |
| 0.0300 | 0.1000 | 0.24090 |
| 0.0600 | 0.1000 | 0.37680 |
| 0.1000 | 0.1000 | 0.58850 |
| 0.2000 | 0.1000 | 0.63490 |
| 0.3000 | 0.1000 | 0.60490 |
| 0.4000 | 0.1000 | 0.64860 |
| 0.0075 | 0.1000 | 0.04025 |
| 0.0150 | 0.1000 | 0.08718 |
| 0.0300 | 0.1000 | 0.22710 |
| 0.0600 | 0.1000 | 0.37440 |
| 0.1000 | 0.1000 | 0.49120 |
| 0.2000 | 0.1000 | 0.59710 |
| 0.3000 | 0.1000 | 0.58710 |
| 0.4000 | 0.1000 | 0.64880 |

; Constant [R] = 0.2000, variable [P]

|        |        |         |
|--------|--------|---------|
| 0.0075 | 0.2000 | 0.04323 |
|--------|--------|---------|

|        |        |         |
|--------|--------|---------|
| 0.0150 | 0.2000 | 0.09872 |
| 0.0300 | 0.2000 | 0.27430 |
| 0.0600 | 0.2000 | 0.48950 |
| 0.1000 | 0.2000 | 0.80310 |
| 0.2000 | 0.2000 | 0.96650 |
| 0.3000 | 0.2000 | 1.17800 |
| 0.4000 | 0.2000 | 1.19700 |
| 0.0075 | 0.2000 | 0.04303 |
| 0.0150 | 0.2000 | 0.09348 |
| 0.0300 | 0.2000 | 0.25100 |
| 0.0600 | 0.2000 | 0.52360 |
| 0.1000 | 0.2000 | 0.79180 |
| 0.2000 | 0.2000 | 0.99280 |
| 0.3000 | 0.2000 | 1.10400 |
| 0.4000 | 0.2000 | 1.19100 |

; Constant [R] = 0.3000, variable [P]

|        |        |         |
|--------|--------|---------|
| 0.0075 | 0.3000 | 0.04482 |
| 0.0150 | 0.3000 | 0.10260 |
| 0.0300 | 0.3000 | 0.28060 |
| 0.0600 | 0.3000 | 0.53340 |
| 0.1000 | 0.3000 | 0.67150 |
| 0.2000 | 0.3000 | 1.27700 |
| 0.3000 | 0.3000 | 1.35500 |
| 0.4000 | 0.3000 | 1.67600 |
| 0.0075 | 0.3000 | 0.04380 |
| 0.0150 | 0.3000 | 0.11200 |
| 0.0300 | 0.3000 | 0.28430 |
| 0.0600 | 0.3000 | 0.56690 |
| 0.1000 | 0.3000 | 0.70200 |
| 0.2000 | 0.3000 | 1.32400 |
| 0.3000 | 0.3000 | 1.40500 |
| 0.4000 | 0.3000 | 1.63600 |

; Constant [R] = 0.4000, variable [P]

|        |        |         |
|--------|--------|---------|
| 0.0075 | 0.4000 | 0.04410 |
| 0.0150 | 0.4000 | 0.10570 |
| 0.0300 | 0.4000 | 0.28690 |
| 0.0600 | 0.4000 | 0.57520 |
| 0.1000 | 0.4000 | 0.75220 |
| 0.2000 | 0.4000 | 1.31700 |
| 0.3000 | 0.4000 | 1.83200 |
| 0.4000 | 0.4000 | 1.94900 |
| 0.0075 | 0.4000 | 0.04505 |
| 0.0150 | 0.4000 | 0.10760 |
| 0.0300 | 0.4000 | 0.27610 |
| 0.0600 | 0.4000 | 0.59340 |
| 0.1000 | 0.4000 | 0.80600 |
| 0.2000 | 0.4000 | 1.41100 |
| 0.3000 | 0.4000 | 1.78300 |
| 0.4000 | 0.4000 | 1.88000 |

[end]

## Results - Model Discrimination #1

Minimum sum of squares = 0.17464

|      | model                  | nD  | nP | SSrel | AICc   | $\Delta$ AICc | weight |
|------|------------------------|-----|----|-------|--------|---------------|--------|
| [1]  | PR*                    | 128 | 2  | 4.537 | -23.6  | 175.6         | 0.000  |
| [2]  | PR*-P2R*               | 128 | 4  | 1.775 | -139.4 | 59.8          | 0.000  |
| [3]  | PR*-PR2*               | 128 | 4  | 1.450 | -165.3 | 33.9          | 0.000  |
| [4]  | PR*-PR2*-P2R*          | 128 | 6  | 1.188 | -186.4 | 12.8          | 0.000  |
| [5]  | PR*-P2R2*              | 128 | 4  | 2.202 | -111.8 | 87.3          | 0.000  |
| [6]  | PR*-P2R*-P2R2*         | 128 | 6  | 1.173 | -188.0 | 11.2          | 0.001  |
| [7]  | PR*-PR2*-P2R2*         | 128 | 6  | 1.138 | -191.8 | 7.3           | 0.007  |
| [8]  | PR*-P2R*-PR2*-P2R2*    | 128 | 8  | 1.056 | -196.9 | 2.3           | 0.082  |
| [9]  | PR*-P2                 | 128 | 3  | 2.293 | -108.8 | 90.4          | 0.000  |
| [10] | PR*-P2R*-P2            | 128 | 5  | 1.521 | -157.0 | 42.1          | 0.000  |
| [11] | PR*-PR2*-P2            | 128 | 5  | 1.451 | -163.1 | 36.1          | 0.000  |
| [12] | PR*-PR2*-P2R*-P2       | 128 | 7  | 1.116 | -192.1 | 7.1           | 0.007  |
| [13] | PR*-P2R2*-P2           | 128 | 5  | 1.094 | -199.2 | 0.0           | 0.259  |
| [14] | PR*-P2R*-P2R2*-P2      | 128 | 7  | 1.069 | -197.6 | 1.6           | 0.116  |
| [15] | PR*-PR2*-P2R2*-P2      | 128 | 7  | 1.064 | -198.2 | 1.0           | 0.160  |
| [16] | PR*-P2R*-PR2*-P2R2*-P2 | 128 | 9  | 1.044 | -196.0 | 3.2           | 0.053  |
| [17] | PR*-R2                 | 128 | 3  | 4.538 | -21.4  | 177.7         | 0.000  |
| [18] | PR*-P2R*-R2            | 128 | 5  | 1.643 | -147.1 | 52.1          | 0.000  |
| [19] | PR*-PR2*-R2            | 128 | 5  | 1.431 | -164.8 | 34.3          | 0.000  |
| [20] | PR*-PR2*-P2R*-R2       | 128 | 7  | 1.167 | -186.4 | 12.8          | 0.000  |
| [21] | PR*-P2R2*-R2           | 128 | 5  | 2.808 | -78.5  | 120.7         | 0.000  |
| [22] | PR*-P2R*-P2R2*-R2      | 128 | 7  | 2.785 | -75.1  | 124.1         | 0.000  |

---

|      |                           |     |    |       |        |      |       |
|------|---------------------------|-----|----|-------|--------|------|-------|
| [23] | PR*-PR2*-P2R2*-R2         | 128 | 7  | 1.137 | -189.7 | 9.5  | 0.002 |
| [24] | PR*-P2R*-PR2*-P2R2*-R2    | 128 | 9  | 1.053 | -194.9 | 4.3  | 0.030 |
| [25] | PR*-P2-R2                 | 128 | 4  | 1.488 | -162.0 | 37.2 | 0.000 |
| [26] | PR*-P2R*-P2-R2            | 128 | 6  | 1.247 | -180.2 | 19.0 | 0.000 |
| [27] | PR*-PR2*-P2-R2            | 128 | 6  | 1.235 | -181.4 | 17.8 | 0.000 |
| [28] | PR*-PR2*-P2R*-P2-R2       | 128 | 8  | 1.071 | -195.1 | 4.1  | 0.034 |
| [29] | PR*-P2R2*-P2-R2           | 128 | 6  | 1.289 | -176.0 | 23.2 | 0.000 |
| [30] | PR*-P2R*-P2R2*-P2-R2      | 128 | 8  | 1.949 | -118.5 | 80.7 | 0.000 |
| [31] | PR*-PR2*-P2R2*-P2-R2      | 128 | 8  | 1.779 | -130.1 | 69.1 | 0.000 |
| [32] | PR*-P2R*-PR2*-P2R2*-P2-R2 | 128 | 10 | 1.000 | -199.1 | 0.1  | 0.248 |

---

## DynaFit Script and Experimental Data - Model Discrimination #2

```
;

---

  
[task]  
  
  data = equilibria  
  task = fit  
  model = PR*-P2R2*-P2 ?  
  
[components]  
  
  P, R  
  
[mechanism]  
  
  P + R <====> P.R          :      Kpr  dissociation  
  P.R + P.R <====> P.R.P.R    :      Kprpr dissociation  
  P + P <====> P.P            :      Kpp  dissociation  
  
[constants]  
  
  Kpr = 0.1 ?  
  Kprpr = 0.1 ?  
  Kpp = 0.1 ?  
  
[responses]  
  
  P.R = 10 ?  
  P.R.P.R = 10 ?  
  
[concentrations]  
  
[data]  
  
  variable      P, R  
  set           alldata  
  
[output]  
  
  directory    ./users/Miller_GP/070510/output/fit-002d  
  
[settings]  
  
{Marquardt}  
  IterationsPerParameter = 300  
  
;

---

  
[task]
```

```

data = equilibria
task = fit
model = PR*-P2R2-P2 ?

[mechanism]

P + R <===> P.R           :      Kpr  dissoc
P.R + P.R <===> P.R.P.R    :      Kprpr dissoc
P + P <===> P.P            :      Kpp  dissoc

[constants]

Kpr = 0.1 ?
Kprpr = 0.1 ?
Kpp = 0.1 ?

[responses]

P.R = 10 ?

; _____

[task]

data = equilibria
task = fit
model = PR*-P2R*-P2R2*-P2 ?

[mechanism]

P + R <===> P.R           :      Kpr  dissoc
P.R + P <===> P.P.R       :      Kppr  dissoc
P.P.R + R <===> P.R.P.R   :      Kprpr  dissoc
P + P <===> P.P           :      Kpp  dissoc

[constants]

Kpr = 0.1 ?
Kppr = 0.1 ?
Kprpr = 0.1 ?
Kpp = 0.1 ?

[responses]

P.R = 10 ?
P.P.R = 10 ?
P.R.P.R = 10 ?

; _____

[task]

data = equilibria
task = fit
model = PR*-P2R*-P2R2-P2 ?

[mechanism]

```

```

P + R <====> P.R          :      Kpr  dissociation
P.R + P <====> P.P.R       :      Kppr  dissociation
P.P.R + R <====> P.R.P.R   :      Kprpr dissociation
P + P <====> P.P           :      Kpp   dissociation

[constants]

Kpr = 0.1 ?
Kppr = 0.1 ?
Kprpr = 0.1 ?
Kpp = 0.1 ?

[responses]

P.R = 10 ?
P.P.R = 10 ?

; _____

[task]

data = equilibria
task = fit
model = PR*-P2R-P2R2*-P2 ?

[mechanism]

P + R <====> P.R          :      Kpr  dissociation
P.R + P <====> P.P.R       :      Kppr  dissociation
P.P.R + R <====> P.R.P.R   :      Kprpr dissociation
P + P <====> P.P           :      Kpp   dissociation

[constants]

Kpr = 0.1 ?
Kppr = 0.1 ?
Kprpr = 0.1 ?
Kpp = 0.1 ?

[responses]

P.R = 10 ?
P.R.P.R = 10 ?

; _____

[task]

data = equilibria
task = fit
model = PR*-P2R-P2R2-P2 ?

[mechanism]

P + R <====> P.R          :      Kpr  dissociation
P.R + P <====> P.P.R       :      Kppr  dissociation

```



```

P.P.R + R <====> P.R.P.R      :      Kprpr  dissoci
P + P <====> P.P              :      Kpp    dissoci

```

[constants]

```

Kpr = 0.1 ?
Kprr = 0.1 ?
Kprpr = 0.1 ?
Kpp = 0.1 ?

```

[responses]

```

P.R = 10 ?

```

;

---

[task]

```

data = equilibria
task = fit
model = PR*-PR2*-P2R2*-P2 ?

```

[mechanism]

```

P + R <====> P.R              :      Kpr    dissoci
P.R + R <====> P.R.R          :      Kprr  dissoci
P.R.R + P <====> P.R.P.R     :      Kprpr dissoci
P + P <====> P.P              :      Kpp   dissoci

```

[constants]

```

Kpr = 0.1 ?
Kprr = 0.1 ?
Kprpr = 0.1 ?
Kpp = 0.1 ?

```

[responses]

```

P.R = 10 ?
P.R.R = 10 ?
P.R.P.R = 10 ?

```

;

---

[task]

```

data = equilibria
task = fit
model = PR*-PR2*-P2R2-P2 ?

```

[mechanism]

```

P + R <====> P.R              :      Kpr    dissoci
P.R + R <====> P.R.R          :      Kprr  dissoci
P.R.R + P <====> P.R.P.R     :      Kprpr dissoci
P + P <====> P.P              :      Kpp   dissoci

```

[constants]

Kpr = 0.1 ?  
Kprrr = 0.1 ?  
Kprpr = 0.1 ?  
Kpp = 0.1 ?

[responses]

P.R = 10 ?  
P.R.R = 10 ?

;

---

[task]

data = equilibria  
task = fit  
model = PR\*-PR2-P2R2\*-P2 ?

[mechanism]

|                          |   |       |        |
|--------------------------|---|-------|--------|
| P + R <====> P.R         | : | Kpr   | dissoc |
| P.R + R <====> P.R.R     | : | Kprrr | dissoc |
| P.R.R + P <====> P.R.P.R | : | Kprpr | dissoc |
| P + P <====> P.P         | : | Kpp   | dissoc |

[constants]

Kpr = 0.1 ?  
Kprrr = 0.1 ?  
Kprpr = 0.1 ?  
Kpp = 0.1 ?

[responses]

P.R = 10 ?  
P.R.P.R = 10 ?

;

---

[task]

data = equilibria  
task = fit  
model = PR\*-PR2-P2R2-P2 ?

[mechanism]

|                          |   |       |        |
|--------------------------|---|-------|--------|
| P + R <====> P.R         | : | Kpr   | dissoc |
| P.R + R <====> P.R.R     | : | Kprrr | dissoc |
| P.R.R + P <====> P.R.P.R | : | Kprpr | dissoc |
| P + P <====> P.P         | : | Kpp   | dissoc |

[constants]

Kpr = 0.1 ?

```
Kprr = 0.1 ?
Kprpr = 0.1 ?
Kpp = 0.1 ?

[responses]

  P.R = 10 ?

;_____

[set:alldata]

...
... AS ABOVE IN MODEL DISCRIMINATION #1
...

[end]
```

## Results - Model Discrimination #2

Minimum sum of squares = 0.185593

|      | model             | nD  | nP | SSrel | AICc   | $\Delta$ AICc | weight |
|------|-------------------|-----|----|-------|--------|---------------|--------|
| [1]  | PR*-P2R2*-P2      | 128 | 5  | 1.029 | -199.2 | 3.4           | 0.058  |
| [2]  | PR*-P2R2-P2       | 128 | 4  | 1.028 | -201.5 | 1.1           | 0.183  |
| [3]  | PR*-P2R*-P2R2*-P2 | 128 | 7  | 1.004 | -197.9 | 4.8           | 0.030  |
| [4]  | PR*-P2R*-P2R2-P2  | 128 | 6  | 1.003 | -200.2 | 2.4           | 0.095  |
| [5]  | PR*-P2R-P2R2*-P2  | 128 | 6  | 1.003 | -200.2 | 2.4           | 0.095  |
| [6]  | PR*-P2R-P2R2-P2   | 128 | 5  | 1.002 | -202.6 | 0.0           | 0.318  |
| [7]  | PR*-PR2*-P2R2*-P2 | 128 | 7  | 1.001 | -198.3 | 4.4           | 0.036  |
| [8]  | PR*-PR2*-P2R2-P2  | 128 | 6  | 1.000 | -200.6 | 2.0           | 0.118  |
| [9]  | PR*-PR2-P2R2*-P2  | 128 | 6  | 1.043 | -195.2 | 7.4           | 0.008  |
| [10] | PR*-PR2-P2R2-P2   | 128 | 5  | 1.028 | -199.3 | 3.3           | 0.061  |
